# Supplementary material for: Cyclometalated iridium(iii) N-heterocyclic carbene complexes as potential mitochondrial anticancer and photodynamic agents
Source: Royal Society of Chemistry journal article supplement (doi:10.1039/c7dt01903c), 2017-01-01
Supplement: c7dt01903c1.pdf [file c7dt01903c1.pdf]

## Cyclometalated Iridium(III) N-Heterocyclic Carbene Complexes as Potential Mitochondrial Anticancer and Photodynamic Agents

Yi Li, <sup>a,b</sup> Bing Liu, <sup>a</sup> Xin-Ran Lu, <sup>a</sup> Meng-Feng Li, <sup>b,\*</sup> Liang-Nian Ji <sup>a</sup> and Zong-Wan Mao <sup>a,\*</sup>

<sup>a</sup>MOE Key Laboratory of Bioinorganic and Synthetic Chemistry, School of Chemistry and Chemical Engineering, Sun Yat-sen University, Guangzhou, 510275, P. R. China. E-mail: cesmzw@mail.sysu.edu.cn.

<sup>b</sup>Department of Microbiology, Zhongshan School of Medicine, Sun Yat-sen University, Guangzhou 510080, P. R. China. E-mail: limf@mail.sysu.edu.cn

### Table of Contents

|                                                                                                    |     |
|----------------------------------------------------------------------------------------------------|-----|
| <b>Table S1</b> The lipophilicity and cellular uptake efficiency of complexes <b>Ir1-Ir4</b> ..... | S2  |
| <b>Table S2</b> IC <sub>50</sub> values of the tested complexes towards different cell lines.....  | S2  |
| <b>Figure S1</b> UV/Vis spectra and normalized emission spectra of <b>Ir1-Ir4</b> .....            | S3  |
| <b>Figure S2</b> Confocal images of A549 cells with <b>Ir1</b> under different conditions.....     | S4  |
| <b>Figure S3</b> Colocalization images of <b>Ir1-Ir4</b> with lysosome dye.....                    | S5  |
| <b>Figure S4</b> Impact of complexes <b>Ir1-Ir4</b> on MMP.....                                    | S6  |
| <b>Figure S5</b> Activation of caspases-3/7 by Ir(III) treatment.....                              | S6  |
| <b>Figure S6</b> ESI-MS spectrum of complexes <b>Ir1</b> .....                                     | S7  |
| <b>Figure S7</b> ESI-MS spectrum of complexes <b>Ir2</b> .....                                     | S7  |
| <b>Figure S8</b> ESI-MS spectrum of complexes <b>Ir3</b> .....                                     | S8  |
| <b>Figure S9</b> ESI-MS spectrum of complexes <b>Ir4</b> .....                                     | S8  |
| <b>Figure S10</b> <sup>1</sup> H NMR spectrum of complexes <b>Ir1</b> .....                        | S9  |
| <b>Figure S11</b> <sup>1</sup> H NMR spectrum of complexes <b>Ir2</b> .....                        | S9  |
| <b>Figure S12</b> <sup>1</sup> H NMR spectrum of complexes <b>Ir3</b> .....                        | S10 |
| <b>Figure S13</b> <sup>1</sup> H NMR spectrum of complexes <b>Ir4</b> .....                        | S10 |

**Table S1** The lipophilicity and cellular uptake efficiency of complexes **Ir1-Ir4**.

| Compounds  | Lipophilicity ( $\log P_{o/w}$ ) | Amount of iridium (nmol per cell) <sup>a</sup> |
|------------|----------------------------------|------------------------------------------------|
| <b>Ir1</b> | 0.94                             | 0.63 ± 0.084                                   |
| <b>Ir2</b> | 0.77                             | 0.49 ± 0.054                                   |
| <b>Ir3</b> | 1.14                             | 0.82 ± 0.13                                    |
| <b>Ir4</b> | 0.82                             | 0.56 ± 0.066                                   |

<sup>a</sup>Data are presented as means ± standard deviation obtained in at least three independent experiments.

**Table S2** IC<sub>50</sub> (μM) values of the tested complexes towards HeLa, U87 and LO2 cell lines at dark and 450 nm.

| Compounds  | HeLa              |                    |                 | U87               |                    |                 | LO2               |                    |                 |
|------------|-------------------|--------------------|-----------------|-------------------|--------------------|-----------------|-------------------|--------------------|-----------------|
|            | Dark <sup>a</sup> | Light <sup>b</sup> | PI <sup>c</sup> | Dark <sup>a</sup> | Light <sup>b</sup> | PI <sup>c</sup> | Dark <sup>a</sup> | Light <sup>b</sup> | PI <sup>c</sup> |
| <b>Ir1</b> | 1.3 ± 0.1         | 0.069 ± 0.013      | 19              | 1.6 ± 0.3         | 0.029 ± 0.008      | 55              | 1.2 ± 0.1         | 0.10 ± 0.03        | 12              |
| <b>Ir2</b> | 1.0 ± 0.1         | 0.26 ± 0.06        | 4               | 1.8 ± 0.3         | 0.046 ± 0.01       | 39              | 2.0 ± 0.3         | 0.81 ± 0.05        | 2.5             |
| <b>Ir3</b> | 1.6 ± 0.4         | 0.11 ± 0.04        | 15              | 1.4 ± 0.2         | 0.069 ± 0.015      | 20              | 1.1 ± 0.1         | 0.17 ± 0.07        | 6.5             |
| <b>Ir4</b> | 1.8 ± 0.2         | 0.11 ± 0.06        | 4               | 1.6 ± 0.2         | 0.040 ± 0.009      | 40              | 2.1 ± 0.3         | 0.50 ± 0.04        | 4.2             |
| cisplatin  | 14.1 ± 1.1        | 13.0 ± 1.2         | 1.1             | 33.4 ± 2.3        | 33.1 ± 2.6         | 1.0             | 11.5 ± 0.5        | 10.9 ± 0.8         | 1.0             |

<sup>a</sup>IC<sub>50</sub> values are drug concentrations necessary for 50% inhibition of cell viability. Data are presented as means ± standard deviation obtained in at least three independent experiments. Cells are treated with complexes for 48 h.

<sup>b</sup>Phototoxicity index is the ratio of the IC<sub>50</sub> value in dark to that obtained upon light irradiation. Cells were treated with the compounds for 12 h and then exposed to 450 nm LED light for 10 min.

<sup>c</sup>PI (Phototoxicity index) is the ratio of the IC<sub>50</sub> value in the dark to that obtained upon light irradiation.

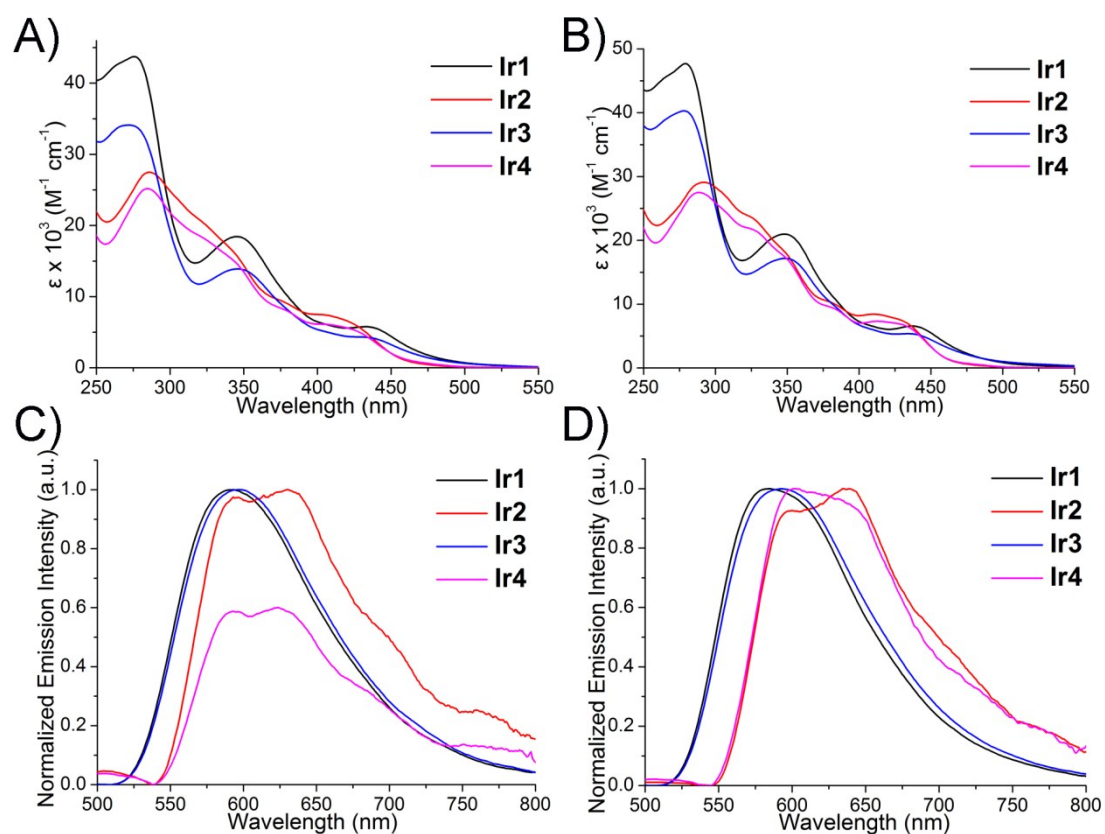

**Fig. S1** A) UV/Vis spectra of **Ir1-Ir4** (20  $\mu\text{M}$ ) in  $\text{CH}_3\text{CN}$  at 298 K. B) UV/Vis spectra of **Ir1-Ir4** (20  $\mu\text{M}$ ) in  $\text{CH}_2\text{Cl}_2$  at 298 K. C) Normalized emission spectra of **Ir1-Ir4** (20  $\mu\text{M}$ ) in  $\text{CH}_3\text{CN}$  at 298 K ( $\lambda_{\text{ex}} = 405 \text{ nm}$ ). D) Normalized emission spectra of **Ir1-Ir4** (20  $\mu\text{M}$ ) in  $\text{CH}_2\text{Cl}_2$  at 298 K ( $\lambda_{\text{ex}} = 405 \text{ nm}$ ).

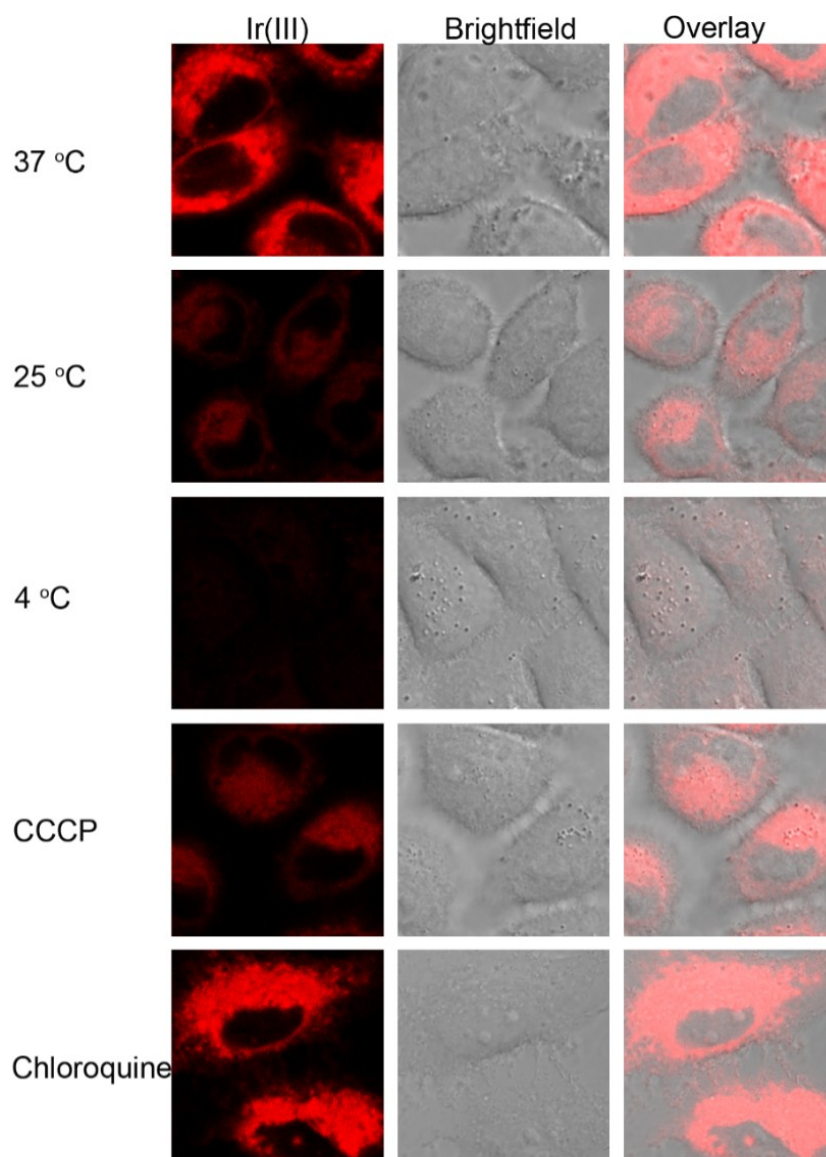

**Fig. S2** Confocal images of A549 cells after incubation with **Ir1** (10  $\mu$ M) under different conditions. (A) Cells were incubated with **Ir1** (10  $\mu$ M) at 37 °C for 10 min. (B) Cells were incubated with **Ir1** (10  $\mu$ M) at 4 °C for 10 min. (C) Cells were pre-incubated with CCCP (10  $\mu$ M) for 1 h at 37 °C and then incubated with **Ir1** (10  $\mu$ M) at 37 °C for 10 min. (D) Cells were pre-incubated with chloroquine (50  $\mu$ M) for 1 h at 37 °C and then incubated with **Ir1** (10  $\mu$ M) at 37 °C for 10 min. Complex **7** was excited at 405 nm and emission was collected at  $600 \pm 20$  nm. Scale bar: 10  $\mu$ m.

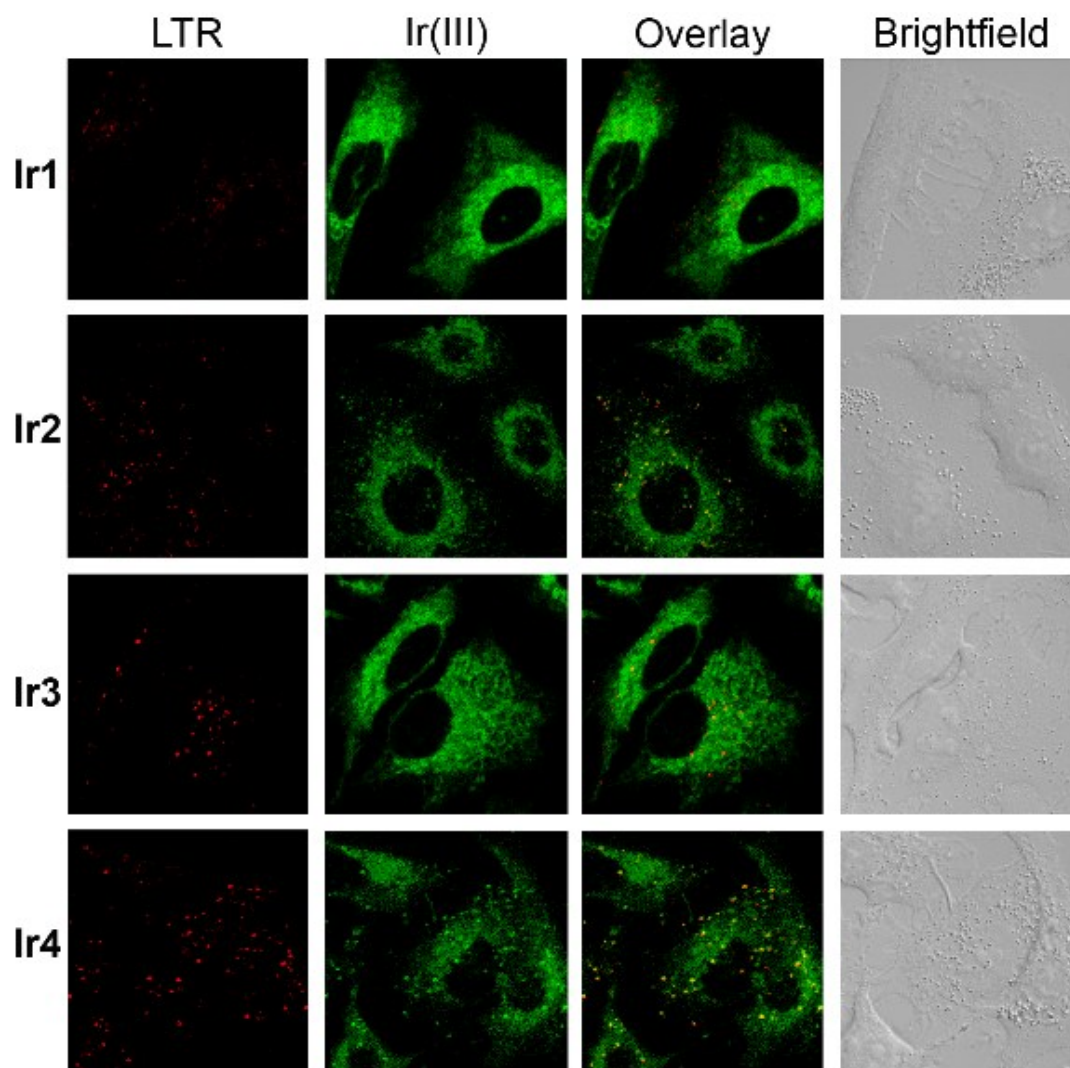

**Fig. S3** Determination of intercellular localization of complexes **Ir1-Ir4** by confocal microscopy. A549 cells were incubated with LTDR (100 nM) for 20 min and then co-incubated with **Ir1-Ir4** (10  $\mu$ M) for another 10 min at 37  $^{\circ}$ C. The Ir(III) complexes were excited at 405 nm and the emission was collected at  $600 \pm 20$  nm. LTDR was excited at 633 nm and the emission was collected at  $660 \pm 20$  nm. Scale bar: 10  $\mu$ m.

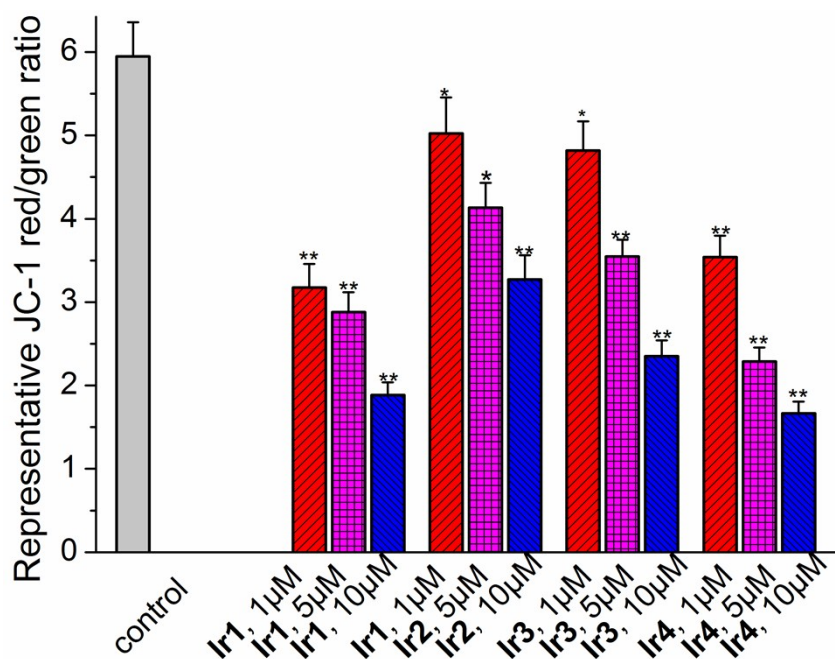

**Fig. S4** Impact of complexes **Ir1-Ir4** on MMP. The fluorescent intensity ratio of A549 cells treated with **Ir1-Ir4** at indicated concentrations for 6 h. Data shown are mean values  $\pm$  standard deviations from three independent experiments. (\*)  $P < 0.01$ , (\*\*)  $P < 0.005$ , compared with the vehicle-treated cells.

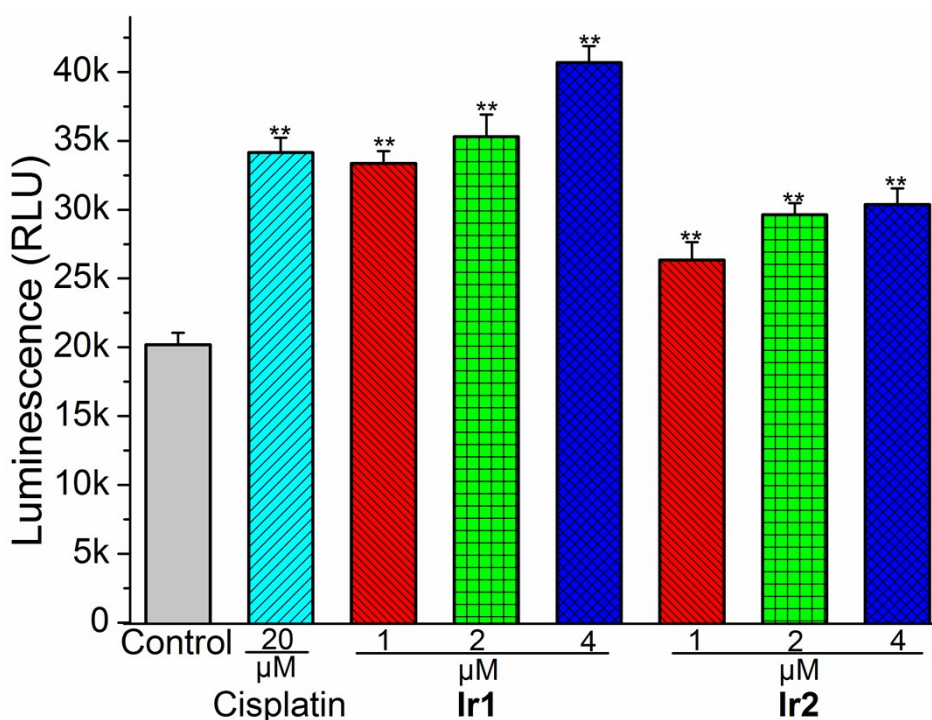

**Fig. S5** Activation of caspases-3/7 by Ir(III) treatment. A549 cells were exposed to cisplatin, **Ir1** and **Ir2** at the indicated concentrations for 12 h. Data shown are mean values  $\pm$  standard deviations from three independent experiments. (\*\*)  $P < 0.005$ , compared with the vehicle-treated cells.

20170704\_170703170458#1022 RT: 2.94 AV: 1 NL: 7.44E6  
T: FTMS + c ESI Full ms [100.00-1500.00]

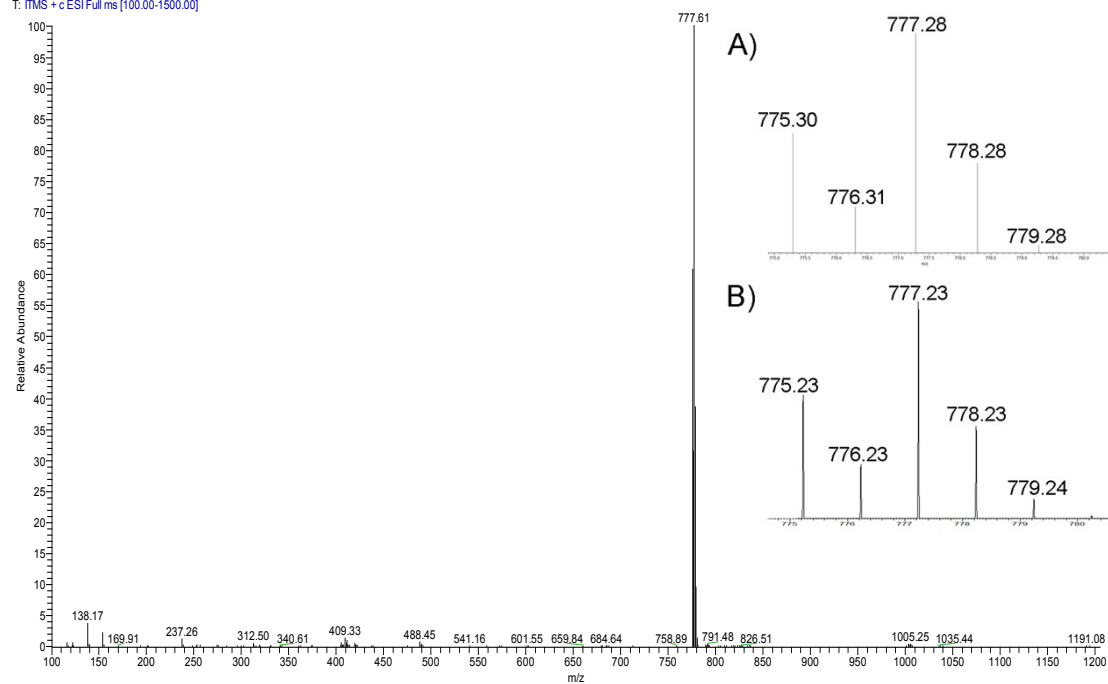

**Figure S6** ESI-MS spectrum of complexes **Ir1**. A) Ion isotopes spectrum of complexes **Ir1**. B) Ion isotopes spectrum of computer simulation using formula  $\text{IrC}_{39}\text{H}_{32}\text{N}_6$ , corresponding to  $[\text{Ir1-Cl}]^+$ .

1604A0274-3 #11 RT: 0.10 AV: 1 SB: 3 0.00-0.02, 0.29-0.31 NL: 1.09E7  
F: + c ESI Q1MS [200.000-1500.000]

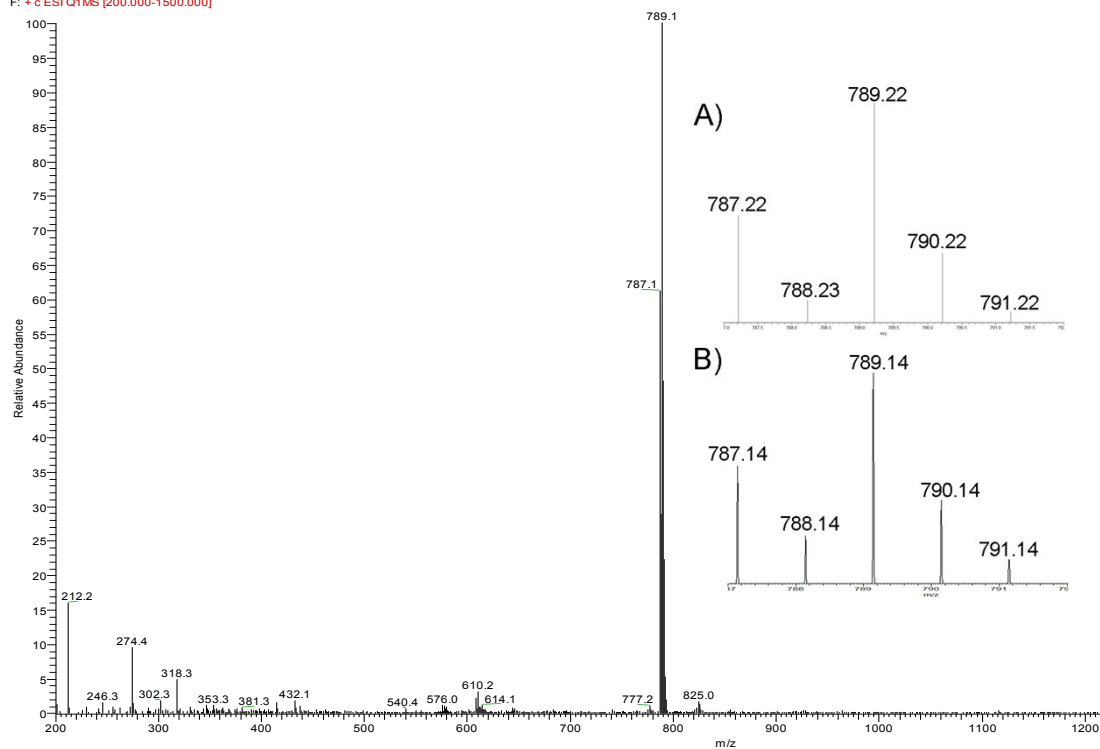

**Figure S7** ESI-MS spectrum of complexes **Ir2**. A) Ion isotopes spectrum of complexes **Ir2**. B) Ion isotopes spectrum of computer simulation using formula  $\text{IrC}_{35}\text{H}_{28}\text{N}_6\text{S}_2$ , corresponding to  $[\text{Ir2-Cl}]^+$ .

1604A0274-5 #11 RT: 0.10 AV: 1 SB: 2 0.01-0.02, 0.27-0.29 NL: 4.12E7  
F: + c ESI Q1MS [200.000-1500.000]

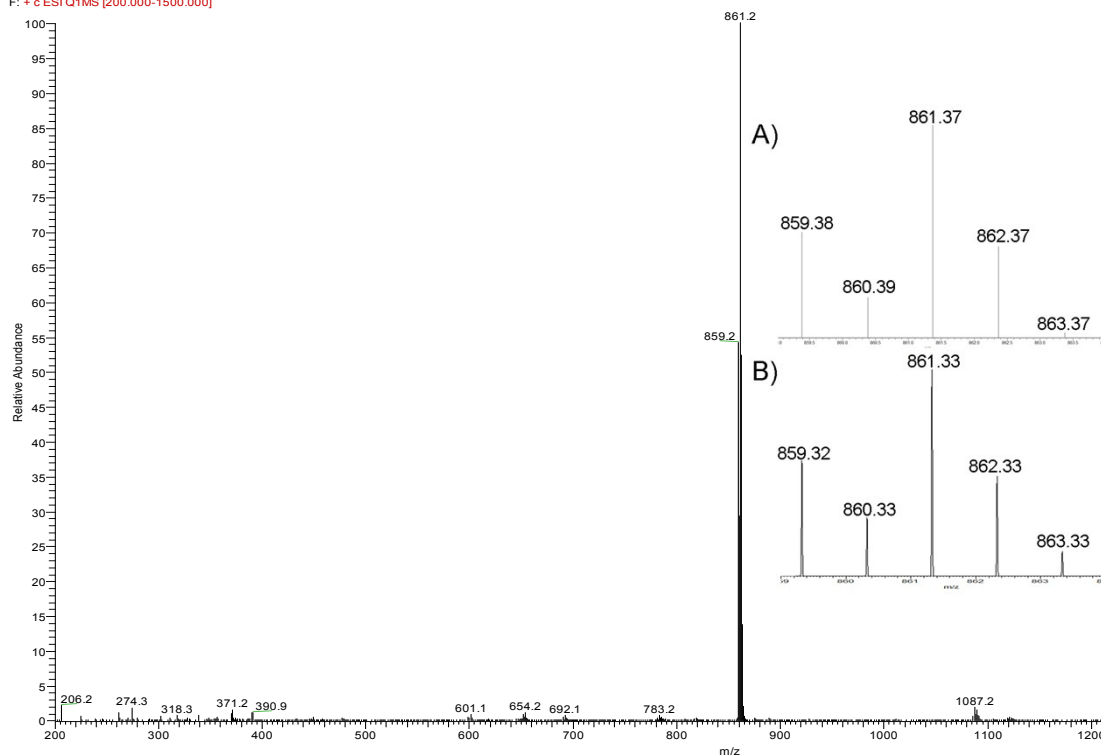

**Figure S8** ESI-MS spectrum of complexes **Ir3**. A) Ion isotopes spectrum of complexes **Ir3**. B) Ion isotopes spectrum of computer simulation using formula  $\text{IrC}_{45}\text{H}_{44}\text{N}_6$ , corresponding to  $[\text{Ir3-Cl}]^+$ .

1604A0274-6 #11 RT: 0.10 AV: 1 SB: 5 0.00-0.03, 0.21-0.26 NL: 1.51E7  
F: + c ESI Q1MS [200.000-1500.000]

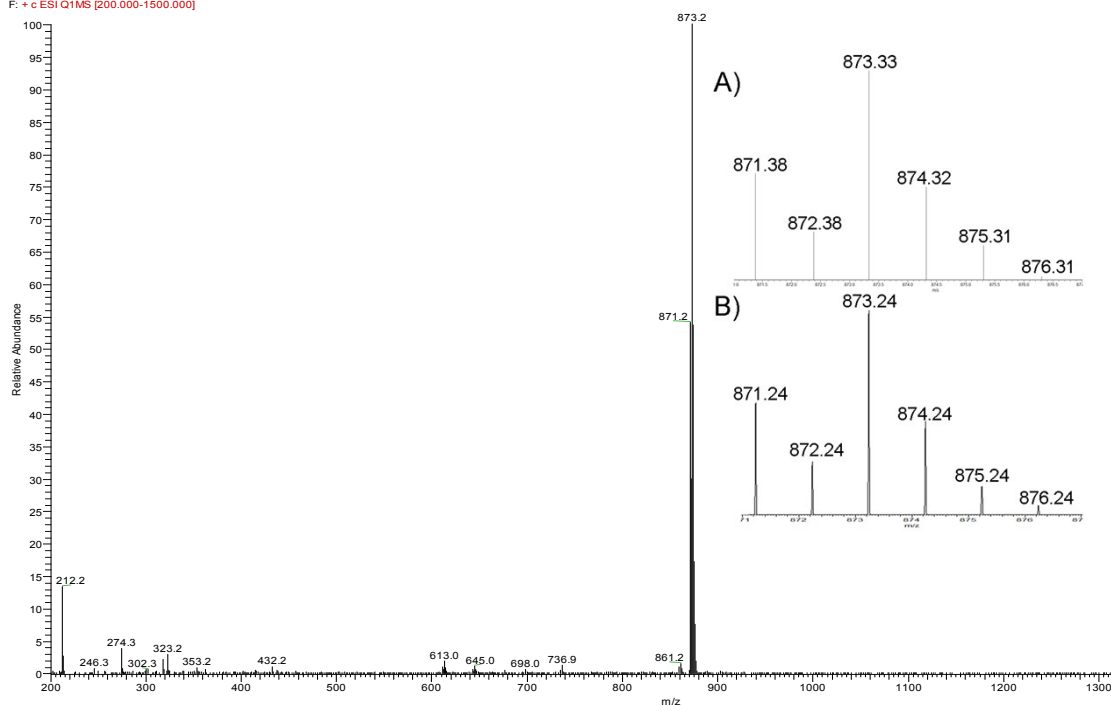

**Figure S9** ESI-MS spectrum of complexes **Ir4**. A) Ion isotopes spectrum of complexes **Ir4**. B) Ion isotopes spectrum of computer simulation using formula  $\text{IrC}_{41}\text{H}_{40}\text{N}_6\text{S}_2$ , corresponding to  $[\text{Ir4-Cl}]^+$ .



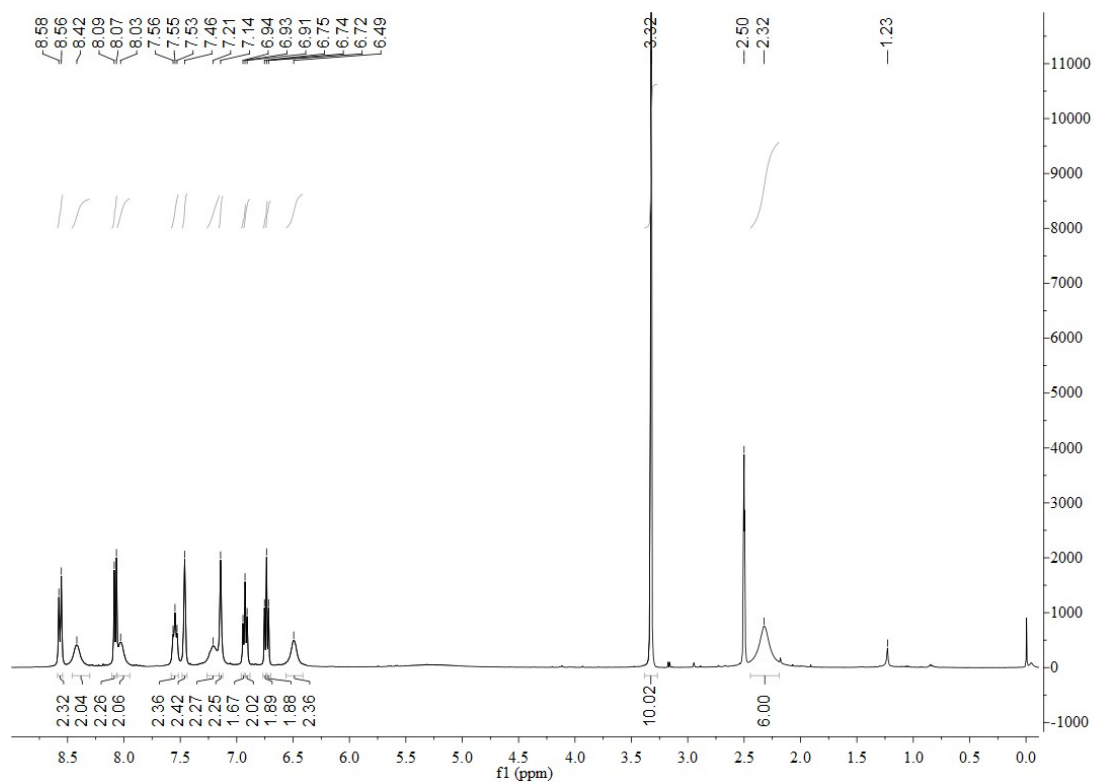

Figure S10  $^1\text{H}$  NMR spectrum of complexes Ir1.

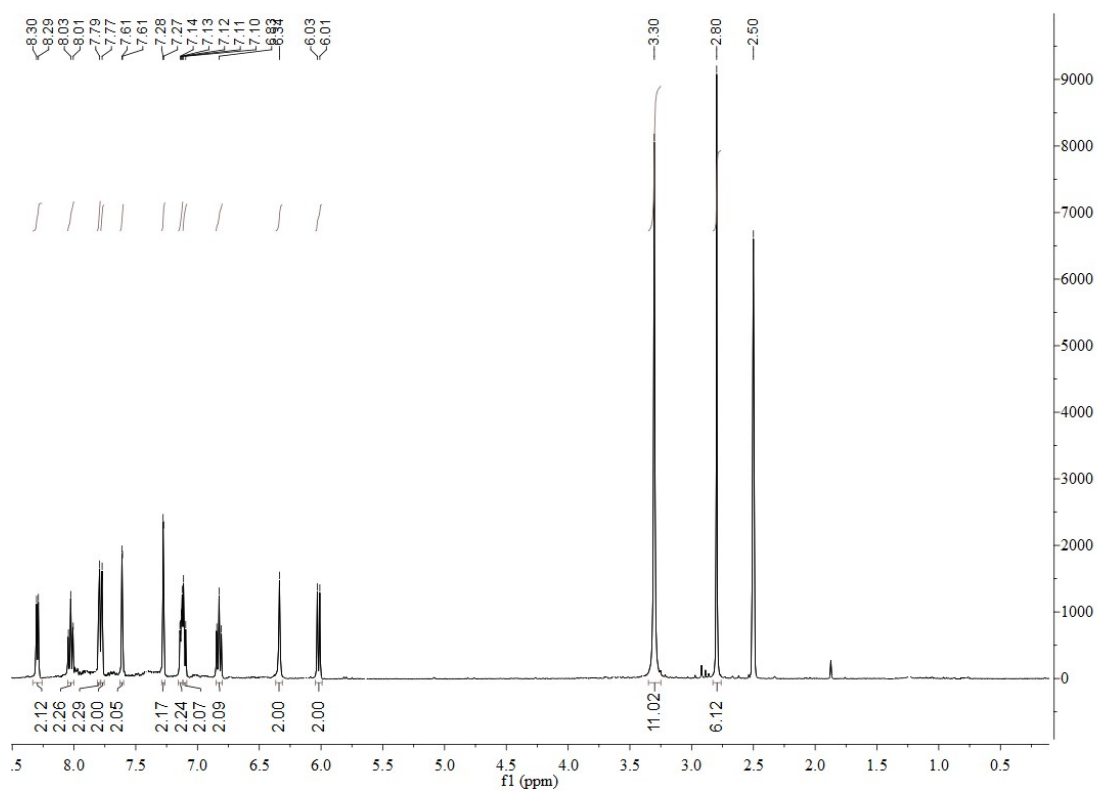

Figure S11  $^1\text{H}$  NMR spectrum of complexes Ir2.

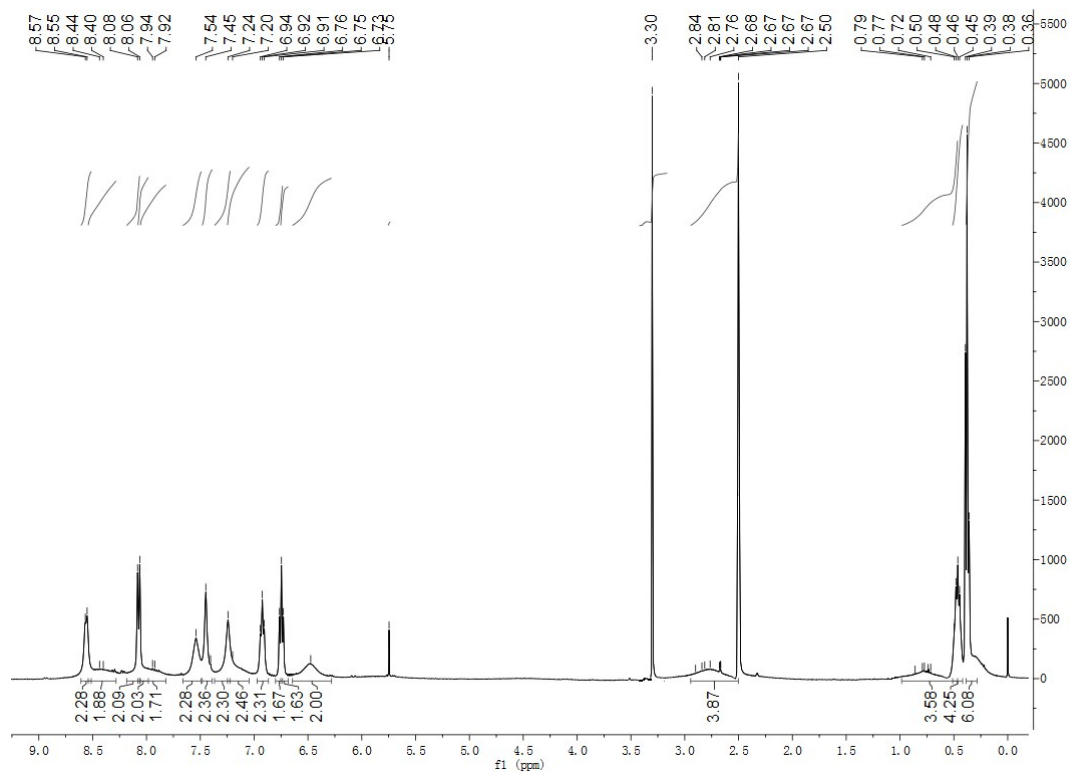

Figure S12  $^1\text{H}$  NMR spectrum of complexes Ir3.

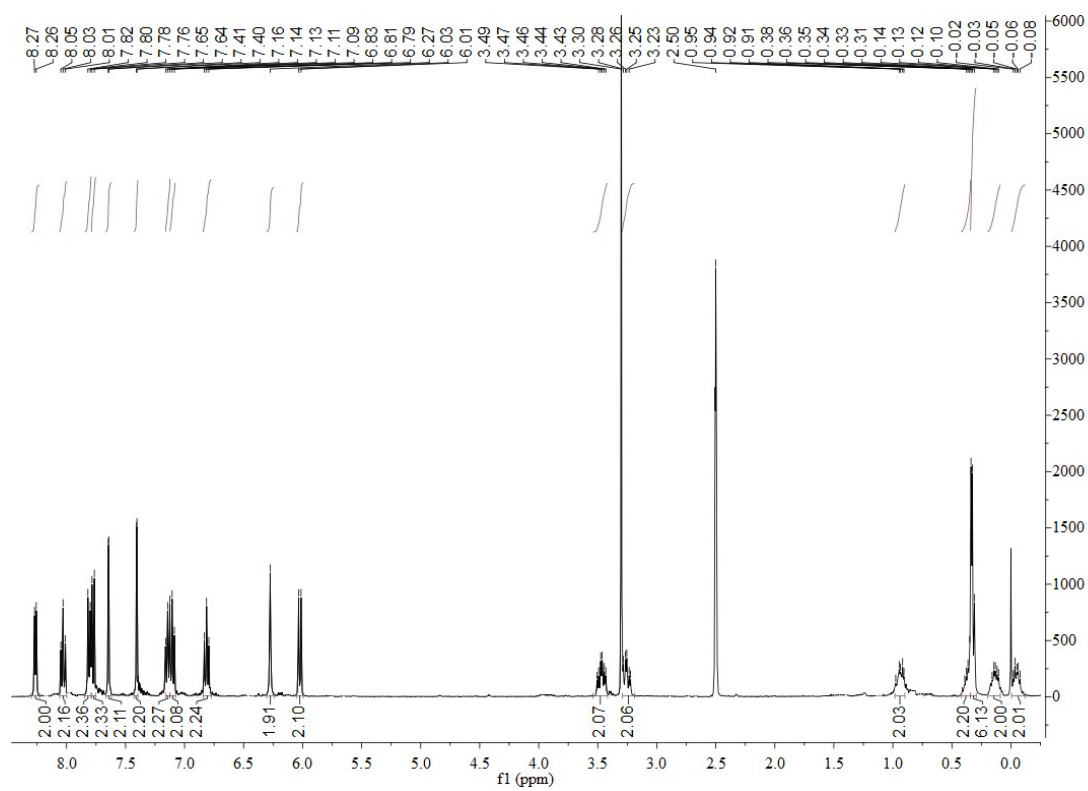

Figure S13  $^1\text{H}$  NMR spectrum of complexes Ir4.
